# Supplementary material for: CNV analysis in the Lithuanian population
Source: PubMed Central journal article supplement (PMC4855864; doi:10.1186/s12863-016-0373-6), 2016-05-04

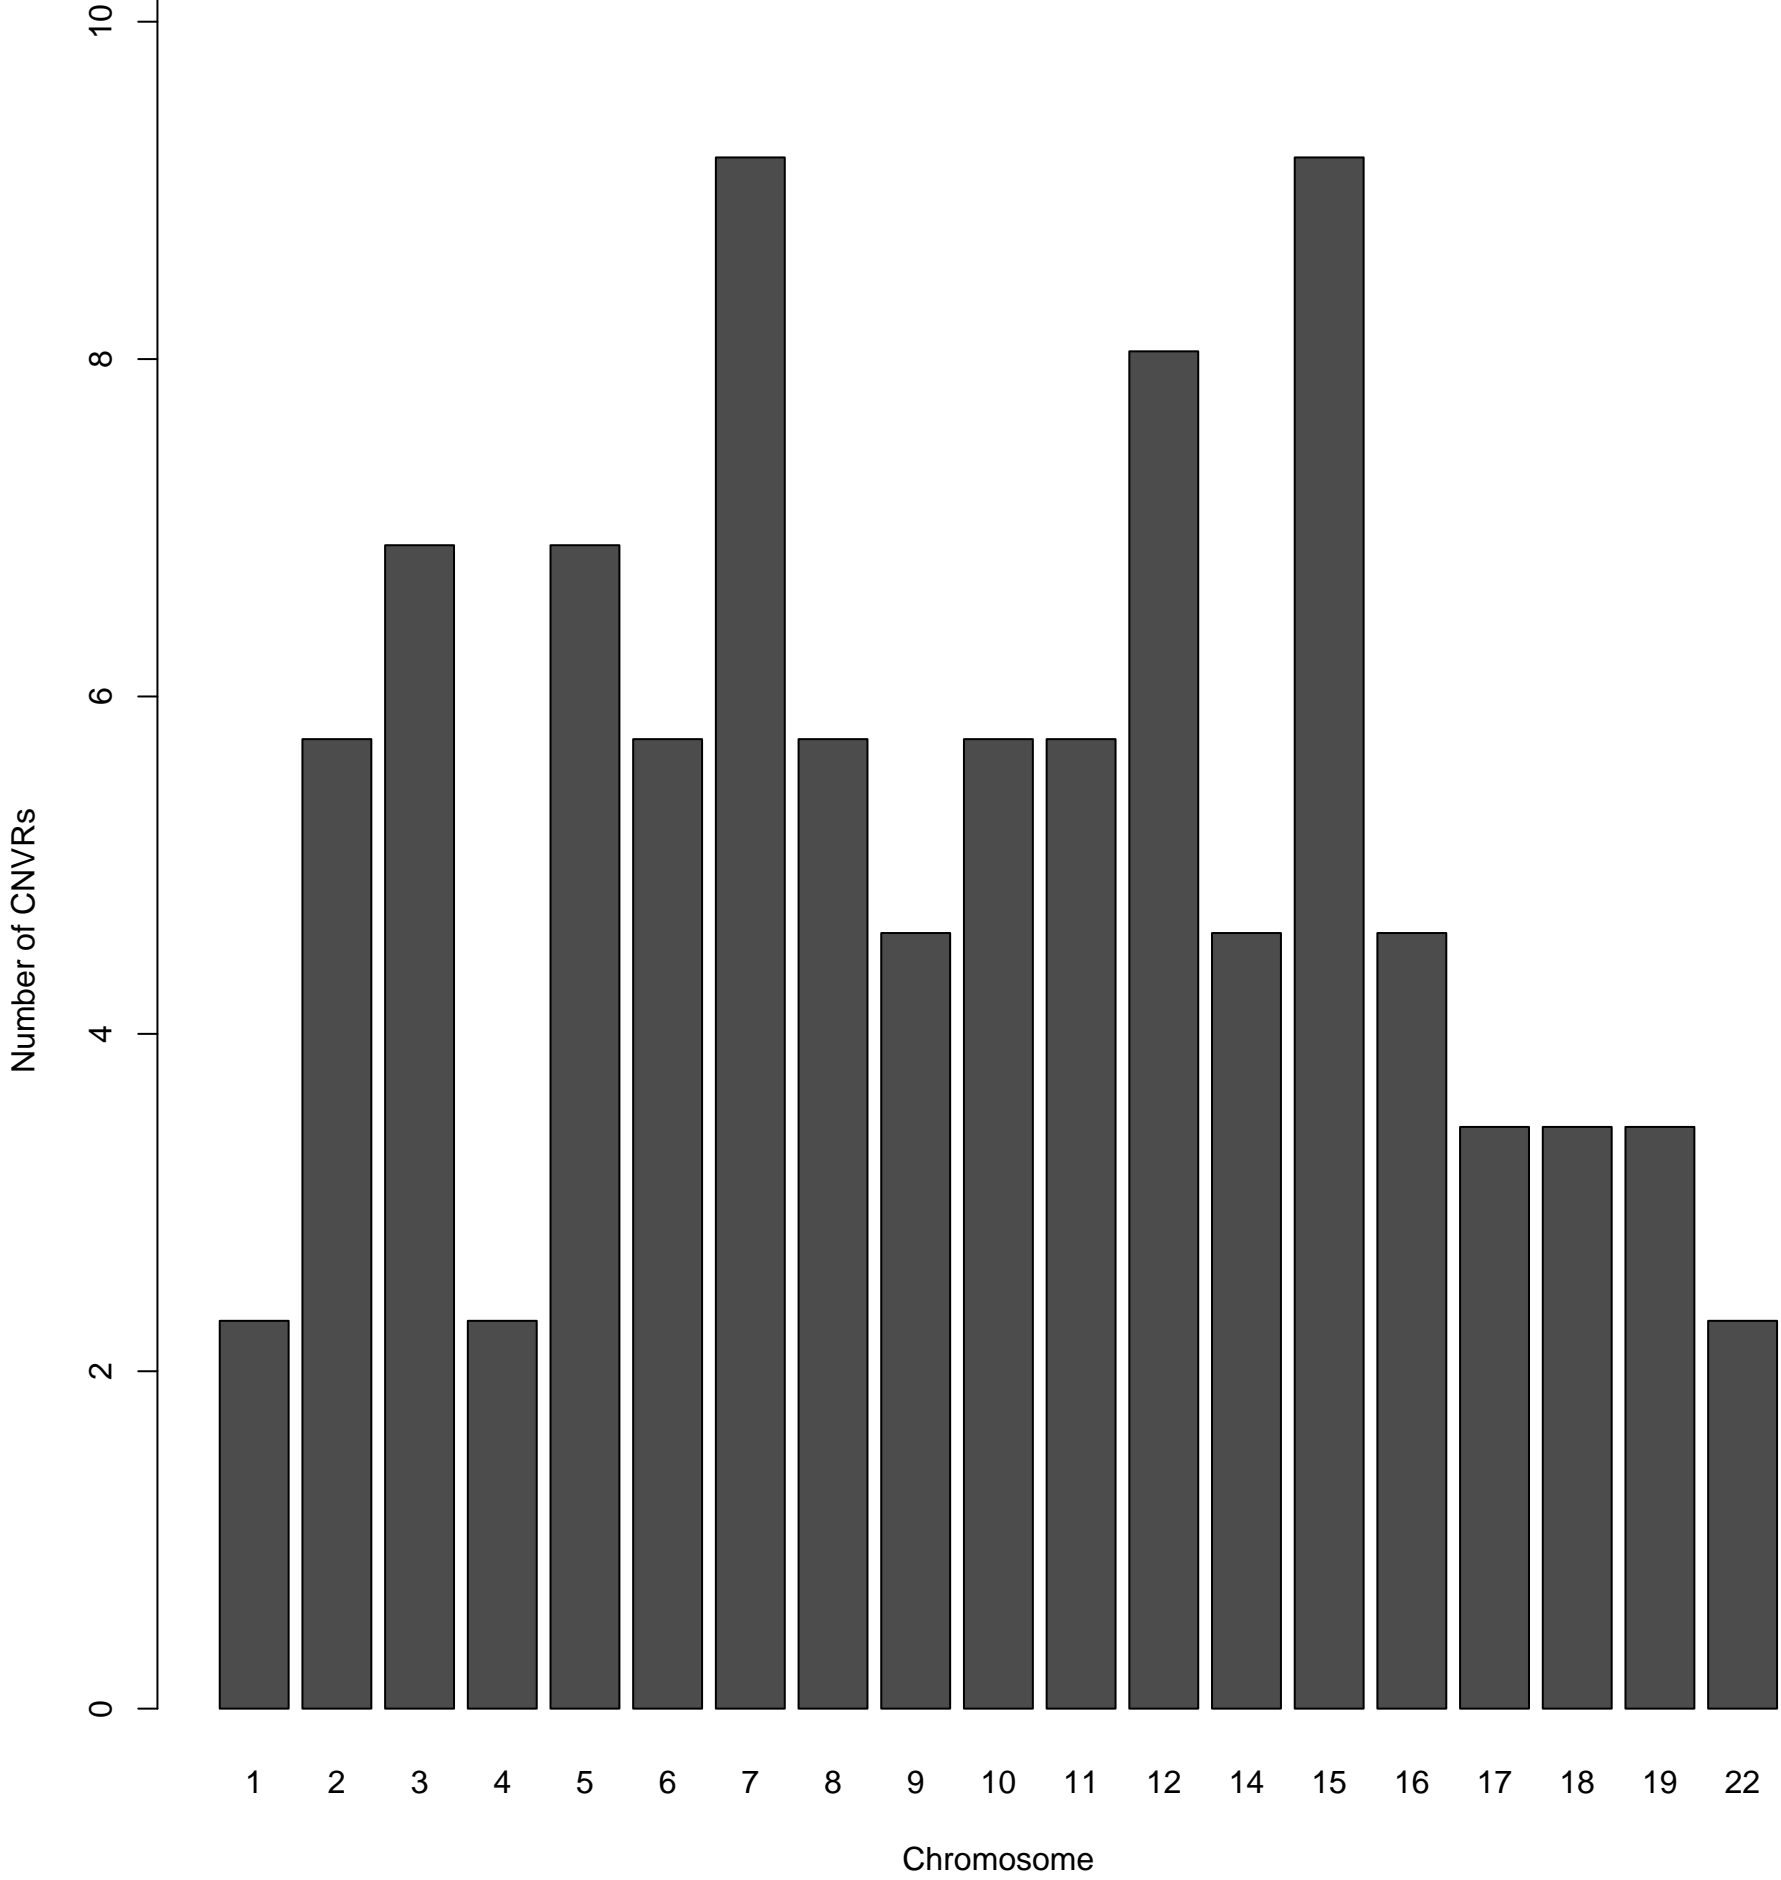

Supplement: 12863_2016_373_MOESM1_ESM.pdf [file 12863_2016_373_MOESM1_ESM.pdf]
