# Supplementary material for: CNV analysis in the Lithuanian population
Source: PubMed Central journal article supplement (PMC4855864; doi:10.1186/s12863-016-0373-6), 2016-05-04
Supplement: 12863_2016_373_MOESM3_ESM.pdf [file 12863_2016_373_MOESM3_ESM.pdf]

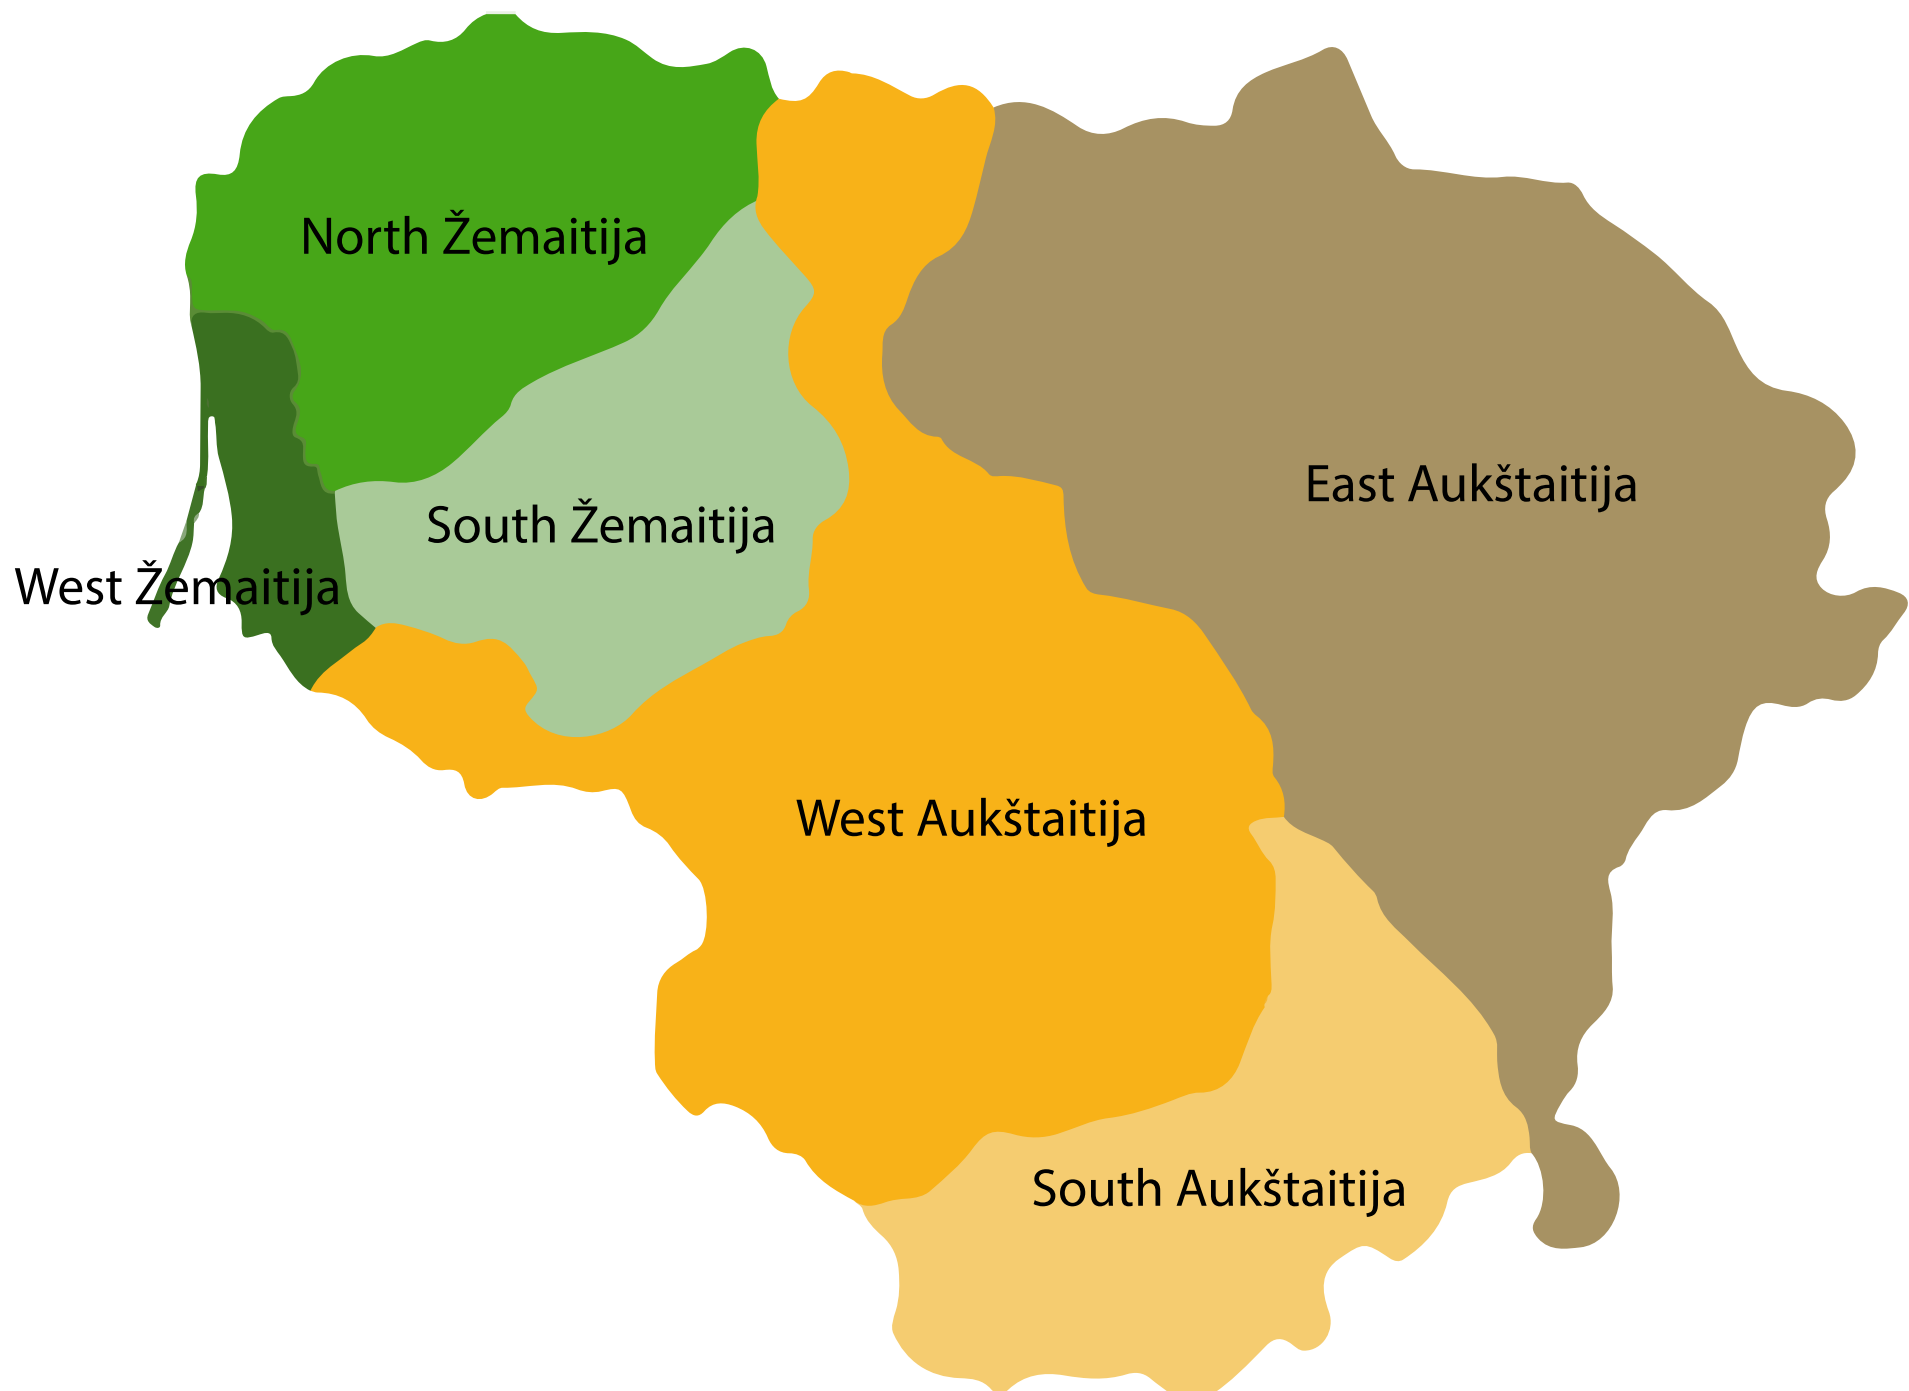

North Žemaitija

South Žemaitija

West Žemaitija

West Aukštaitija

East Aukštaitija

South Aukštaitija
